# Supplementary material for: ERF5 and ERF6 Play Redundant Roles as Positive Regulators of JA/Et-Mediated Defense against Botrytis cinerea in Arabidopsis
Source: PubMed Central journal article supplement (PMC3338558; doi:10.1371/journal.pone.0035995), 2012-04-26

**Figure S2. The *erf5 erf6* double mutant shows reduced expression of *ERF5* and *ERF6*.** Relative accumulation of *ERF5* or *ERF6* mRNA was measured by qRT-PCR in ten-day old seedlings. Relative Quantitation (RQ) values were calculated after normalization to *PEX4* expression levels. Each value is the mean of three technical replicates and the data are representative of three independent experiments. The error bars represent  $RQ_{MIN}$  and  $RQ_{MAX}$  and constitute the acceptable error level for a 95% confidence level according to Student's *t*-test.

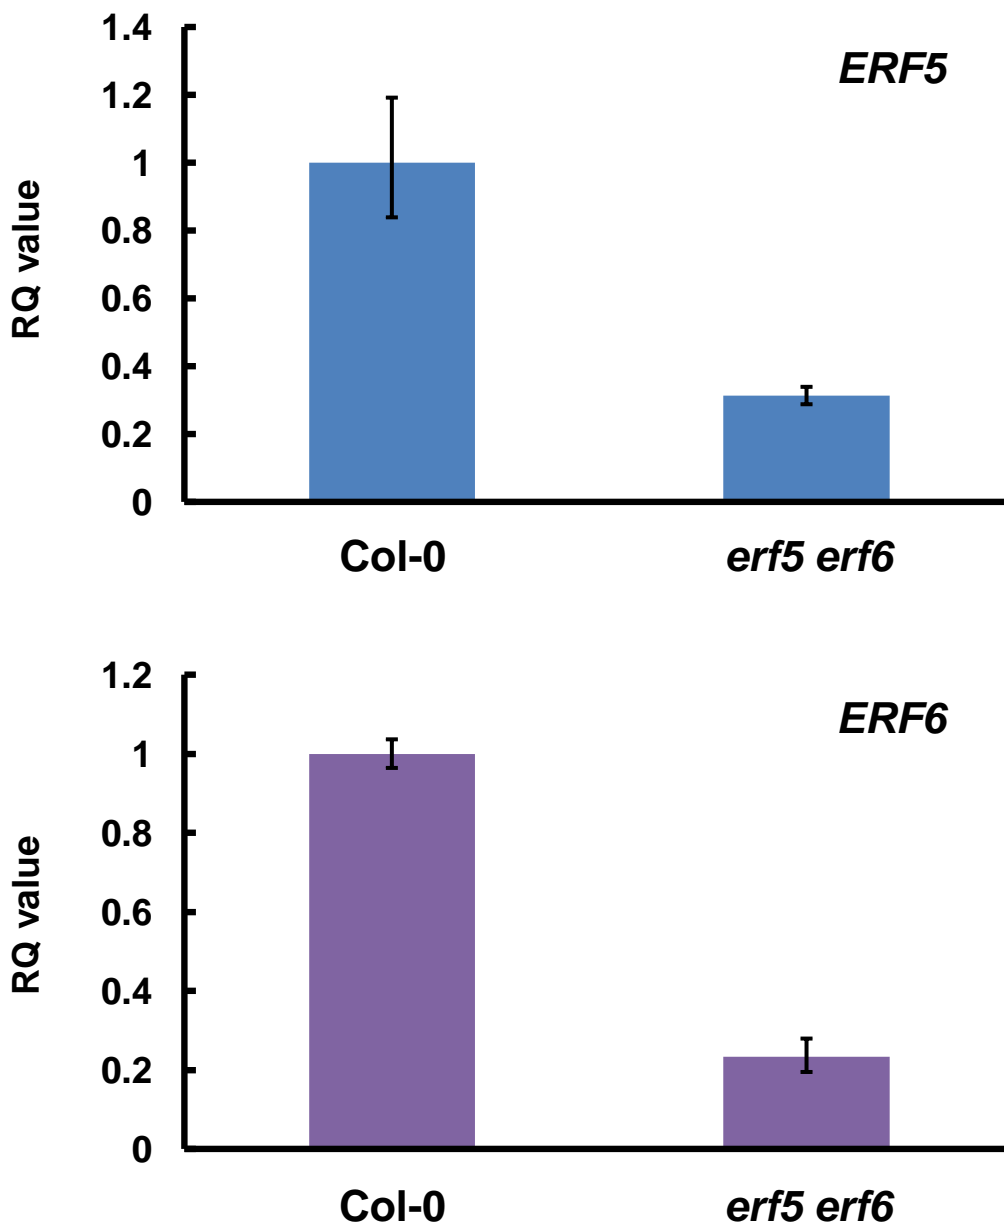

Supplement: pone.0035995.s002.pdf [file pone.0035995.s002.pdf]
