# Supplementary material for: ERF5 and ERF6 Play Redundant Roles as Positive Regulators of JA/Et-Mediated Defense against Botrytis cinerea in Arabidopsis
Source: PubMed Central journal article supplement (PMC3338558; doi:10.1371/journal.pone.0035995), 2012-04-26
Supplement: pone.0035995.s003.pdf [file pone.0035995.s003.pdf]

**Table S1. Promoter motif enrichment analysis of genes significantly upregulated in 35S:ERF5 plants**

| Motif length (bp) | Identifier                  | Ratio <sup>a</sup> | Occ <sup>b</sup> | Exp occ <sup>c</sup> | Occ <i>p</i> <sup>d</sup> | Occ <i>e</i> <sup>e</sup> | Z score <sup>f</sup> | Matching sequences <sup>g</sup> |
|-------------------|-----------------------------|--------------------|------------------|----------------------|---------------------------|---------------------------|----------------------|---------------------------------|
| 5                 | ccgcc ggcgg                 | 2.3                | 20               | 8.76                 | 0.00077                   | 7.90E-01                  | 3.8                  | 16                              |
| 5                 | gccca tgggc                 | 2.2                | 47               | 21.72                | 1.70E-06                  | 1.80E-03                  | 5.42                 | 19                              |
| 5                 | cagcc ggctg                 | 2.1                | 42               | 19.87                | 1.00E-05                  | 1.00E-02                  | 4.97                 | 24                              |
| 5                 | gagga tcctc                 | 1.8                | 39               | 21.15                | 0.00032                   | 3.30E-01                  | 3.88                 | 23                              |
| 5                 | ccacc ggtgg                 | 1.8                | 42               | 23.83                | 0.00048                   | 4.90E-01                  | 3.72                 | 24                              |
| 5                 | agaga tctct                 | 1.4                | 99               | 70.85                | 0.0009                    | 9.20E-01                  | 3.34                 | 33                              |
| 6                 | gcagcc ggctgc               | 5.1                | 15               | 2.96                 | 5.70E-07                  | 2.30E-03                  | 6.99                 | 13                              |
| 6                 | gccgcc ggcggc <sup>h</sup>  | 5.0                | 9                | 1.8                  | 0.00011                   | 4.40E-01                  | 5.37                 | 9                               |
| 6                 | ggacc gggtcc                | 4.4                | 10               | 2.27                 | 0.00013                   | 5.20E-01                  | 5.13                 | 9                               |
| 6                 | cagccg cggctg               | 3.8                | 12               | 3.13                 | 0.00011                   | 4.20E-01                  | 5.01                 | 8                               |
| 6                 | agccg gcgct                 | 3.8                | 11               | 2.92                 | 0.00024                   | 9.40E-01                  | 4.72                 | 9                               |
| 6                 | agccca tgggct               | 3.3                | 26               | 7.78                 | 2.10E-07                  | 8.40E-04                  | 6.54                 | 10                              |
| 6                 | gccacc ggtggc               | 3.2                | 15               | 4.76                 | 0.00013                   | 5.40E-01                  | 4.7                  | 13                              |
| 7                 | agccgc ggcggct <sup>i</sup> | 13.9               | 8                | 0.57                 | 1.80E-07                  | 2.30E-03                  | 9.8                  | 8                               |
| 7                 | cagccg cgggctg              | 13.6               | 6                | 0.44                 | 7.20E-06                  | 9.50E-02                  | 8.35                 | 4                               |
| 7                 | ccggccc gggccc              | 12.8               | 5                | 0.39                 | 5.60E-05                  | 7.40E-01                  | 7.36                 | 2                               |
| 7                 | agcagcc ggctgct             | 11.5               | 11               | 0.96                 | 6.30E-09                  | 8.40E-05                  | 10.28                | 10                              |
| 7                 | ggacca tgggtcc              | 7.4                | 7                | 0.95                 | 6.10E-05                  | 8.10E-01                  | 6.2                  | 7                               |
| 7                 | accagcc ggctggt             | 7.3                | 9                | 1.23                 | 5.80E-06                  | 7.70E-02                  | 7.01                 | 7                               |
| 7                 | cgttgg tccaacg              | 6.5                | 13               | 2.01                 | 2.20E-07                  | 2.90E-03                  | 7.75                 | 12                              |
| 7                 | ggtgtac gtacacc             | 5.8                | 9                | 1.56                 | 3.80E-05                  | 5.00E-01                  | 5.95                 | 3                               |
| 7                 | ccaacg ccgttg               | 5.6                | 9                | 1.6                  | 4.50E-05                  | 6.00E-01                  | 5.85                 | 7                               |
| 7                 | gggtcca tggacc              | 5.5                | 9                | 1.65                 | 5.80E-05                  | 7.60E-01                  | 5.72                 | 8                               |
| 7                 | aagccca tgggctt             | 4.2                | 12               | 2.89                 | 5.00E-05                  | 6.70E-01                  | 5.36                 | 8                               |
| 7                 | atcaacc ggttgat             | 3.9                | 17               | 4.38                 | 3.70E-06                  | 5.00E-02                  | 6.03                 | 15                              |
| 7                 | agataga tctatct             | 2.8                | 20               | 7.23                 | 6.80E-05                  | 9.00E-01                  | 4.75                 | 13                              |
| 8                 | agcagccg cggctgct           | 26.2               | 4                | 0.15                 | 2.00E-05                  | 6.00E-01                  | 9.85                 | 3                               |
| 8                 | ccgttgg tccaacgg            | 18.2               | 7                | 0.39                 | 1.80E-07                  | 5.40E-03                  | 10.66                | 6                               |
| 8                 | tggacca tgggtcca            | 15.3               | 6                | 0.39                 | 3.60E-06                  | 1.10E-01                  | 8.95                 | 6                               |
| 8                 | gtacacca tgggttac           | 13.4               | 8                | 0.6                  | 2.40E-07                  | 7.10E-03                  | 9.58                 | 3                               |
| 8                 | aaccagcc ggctggtt           | 13.3               | 6                | 0.45                 | 7.80E-06                  | 2.40E-01                  | 8.28                 | 5                               |
| 8                 | atccaacg cgttgat            | 11.8               | 10               | 0.85                 | 2.40E-08                  | 7.20E-04                  | 9.95                 | 9                               |
| 8                 | gtgtacta tagtacac           | 9.5                | 7                | 0.74                 | 1.30E-05                  | 3.80E-01                  | 7.27                 | 3                               |
| 8                 | aggttgat atcaacct           | 7.9                | 9                | 1.14                 | 3.30E-06                  | 9.90E-02                  | 7.35                 | 9                               |

<sup>a</sup> Observed/expected occurrence ratio<sup>b</sup> Observed occurrences<sup>c</sup> Expected occurrences<sup>d</sup> Occurrence probability (binomial)<sup>e</sup> *e*-value for occurrences (binomial)<sup>f</sup> Z score(Gaussian approximation)<sup>g</sup> Number of genes which contain at least one occurrence<sup>h</sup> GCC core<sup>i</sup> GCC box
