# Supplementary material for: ERF5 and ERF6 Play Redundant Roles as Positive Regulators of JA/Et-Mediated Defense against Botrytis cinerea in Arabidopsis
Source: PubMed Central journal article supplement (PMC3338558; doi:10.1371/journal.pone.0035995), 2012-04-26
Supplement: pone.0035995.s004.pdf [file pone.0035995.s004.pdf]

**Table S2. Promoter motif enrichment analysis of genes significantly upregulated in 35S:ERF6 plants**

| Motif length (bp) | Identifier                   | Ratio <sup>a</sup> | Occ <sup>b</sup> | Exp occ <sup>c</sup> | Occ <i>p</i> <sup>d</sup> | Occ <i>e</i> <sup>e</sup> | Z score <sup>f</sup> | Matching sequences <sup>g</sup> |
|-------------------|------------------------------|--------------------|------------------|----------------------|---------------------------|---------------------------|----------------------|---------------------------------|
| 5                 | ccgcc ggcgg                  | 2.3                | 27               | 11.7                 | 8.60E-05                  | 8.90E-02                  | 4.45                 | 20                              |
| 5                 | gcagc gctgc                  | 2.1                | 36               | 17.0                 | 3.90E-05                  | 4.00E-02                  | 4.6                  | 20                              |
| 5                 | gagga tctc                   | 1.9                | 50               | 26.6                 | 3.40E-05                  | 3.50E-02                  | 4.53                 | 24                              |
| 5                 | gaaga tctc                   | 1.5                | 120              | 80.9                 | 2.90E-05                  | 2.90E-02                  | 4.3                  | 39                              |
| 5                 | acaag cttgt                  | 1.5                | 121              | 83.4                 | 6.30E-05                  | 6.40E-02                  | 4.1                  | 37                              |
| 5                 | gagaa ttctc                  | 1.4                | 128              | 90.7                 | 0.00012                   | 1.30E-01                  | 3.9                  | 37                              |
| 5                 | atgga tccat                  | 1.4                | 97               | 68.9                 | 0.0008                    | 8.20E-01                  | 3.4                  | 37                              |
| 5                 | aagaa ttctt                  | 1.3                | 242              | 193.1                | 0.00038                   | 3.90E-01                  | 3.5                  | 39                              |
| 6                 | gccgcc ggcggc <sup>h</sup>   | 5.4                | 12               | 2.2                  | 4.00E-06                  | 1.60E-02                  | 6.6                  | 12                              |
| 6                 | agccc gcggct                 | 3.9                | 13               | 3.3                  | 4.40E-05                  | 1.80E-01                  | 5.3                  | 11                              |
| 6                 | gcagc ggctgc                 | 3.7                | 13               | 3.5                  | 7.70E-05                  | 3.10E-01                  | 5.1                  | 11                              |
| 6                 | agcagc gctgct                | 3.0                | 16               | 5.3                  | 0.00014                   | 5.70E-01                  | 4.6                  | 13                              |
| 6                 | cacaag cttgtg                | 2.1                | 36               | 17.4                 | 6.10E-05                  | 2.50E-01                  | 4.5                  | 23                              |
| 6                 | agaaga tctct                 | 1.8                | 52               | 29.3                 | 9.60E-05                  | 3.90E-01                  | 4.2                  | 29                              |
| 6                 | aattag ctaatt                | 1.6                | 63               | 38.5                 | 0.00018                   | 7.20E-01                  | 4.0                  | 31                              |
| 6                 | aaatta taatt                 | 1.4                | 150              | 105.7                | 2.80E-05                  | 1.10E-01                  | 4.3                  | 37                              |
| 6                 | aagaaa ttctt                 | 1.4                | 118              | 83.6                 | 0.00022                   | 8.90E-01                  | 3.8                  | 39                              |
| 7                 | agccgcc ggcggct <sup>i</sup> | 14.2               | 10               | 0.7                  | 4.50E-09                  | 6.20E-05                  | 11.1                 | 10                              |
| 7                 | agcagc ggctgct               | 7.1                | 8                | 1.1                  | 2.50E-05                  | 3.40E-01                  | 6.5                  | 7                               |
| 7                 | accagc ggctggt               | 5.7                | 9                | 1.6                  | 4.10E-05                  | 5.70E-01                  | 5.9                  | 7                               |
| 7                 | aattag cctaatt               | 3.3                | 17               | 5.2                  | 2.80E-05                  | 3.90E-01                  | 5.2                  | 14                              |
| 7                 | aaacaaa ttgttt               | 1.7                | 68               | 40.6                 | 5.30E-05                  | 7.30E-01                  | 4.3                  | 33                              |
| 8                 | agccgcc cgcgggct             | 37.1               | 4                | 0.1                  | 5.20E-06                  | 1.70E-01                  | 11.9                 | 4                               |
| 8                 | agccgcc ggcggct              | 33.5               | 4                | 0.1                  | 7.70E-06                  | 2.50E-01                  | 11.2                 | 4                               |
| 8                 | ggcggcta tagccgcc            | 28.2               | 5                | 0.2                  | 1.30E-06                  | 4.10E-02                  | 11.5                 | 5                               |
| 8                 | agcagcc cggtgct              | 24.0               | 4                | 0.2                  | 2.80E-05                  | 9.20E-01                  | 9.4                  | 3                               |
| 8                 | aaccagc ggctggt              | 11.7               | 7                | 0.6                  | 3.30E-06                  | 1.10E-01                  | 8.3                  | 6                               |
| 8                 | agccatca tgatggct            | 7.2                | 8                | 1.1                  | 2.20E-05                  | 7.10E-01                  | 6.5                  | 8                               |
| 8                 | tagataga tctatcta            | 5.8                | 13               | 2.2                  | 7.10E-07                  | 2.30E-02                  | 7.2                  | 11                              |
| 8                 | taattca tgaatta              | 3.5                | 19               | 5.5                  | 4.90E-06                  | 1.60E-01                  | 5.8                  | 16                              |

<sup>a</sup> Observed/expected occurrence ratio<sup>b</sup> Observed occurrences<sup>c</sup> Expected occurrences<sup>d</sup> Occurrence probability (binomial)<sup>e</sup> *e*-value for occurrences (binomial)<sup>f</sup> Z score(Gaussian approximation)<sup>g</sup> Number of genes which contain at least one occurrence<sup>h</sup> GCC core<sup>i</sup> GCC box
