# Supplementary material for: ERF5 and ERF6 Play Redundant Roles as Positive Regulators of JA/Et-Mediated Defense against Botrytis cinerea in Arabidopsis
Source: PubMed Central journal article supplement (PMC3338558; doi:10.1371/journal.pone.0035995), 2012-04-26
Supplement: pone.0035995.s005.pdf [file pone.0035995.s005.pdf]

**Table S3. Fold induction values of *ERF5*, *ERF6*, *ERF1* and *ORA59* in response to ethylene and jasmonic acid treatment.** Fold change in transcript level observed in 7-d old wild-type Col-0 plants treated with 10  $\mu$ M ACC or 10  $\mu$ M MeJA for 0.5, 1 or 3 h. Microarray data from the AtGenExpress project with the TAIR submission number ME00334 (ACC) and ME00337 (MeJA) [48]. Values obtained from the eFP Browser on the Botany Array Resource (BAR) [49].

| <b>AGI number</b> | <b>Gene description</b> | <b>ACC<br/>0.5 h</b> | <b>ACC<br/>1 h</b> | <b>ACC<br/>3 h</b> | <b>MeJA<br/>0.5 h</b> | <b>MeJA<br/>1 h</b> | <b>MeJA<br/>3 h</b> |
|-------------------|-------------------------|----------------------|--------------------|--------------------|-----------------------|---------------------|---------------------|
| At5g47230         | ERF5                    | 1.77                 | 1.63               | 1.14               | 1.39                  | 1.12                | 0.91                |
| At4g17490         | ERF6                    | 0.92                 | 1.96               | 1.24               | 2.51                  | 3.17                | 0.86                |
| At3g23240         | ERF1                    | 0.68                 | 2.03               | 2.14               | 2.48                  | 2.73                | 1.4                 |
| At1g06160         | ORA59                   | 1.41                 | 3.88               | 1.75               | 7.59                  | 6.57                | 1.32                |
