# Supplementary material for: ERF5 and ERF6 Play Redundant Roles as Positive Regulators of JA/Et-Mediated Defense against Botrytis cinerea in Arabidopsis
Source: PubMed Central journal article supplement (PMC3338558; doi:10.1371/journal.pone.0035995), 2012-04-26
Supplement: pone.0035995.s006.pdf [file pone.0035995.s006.pdf]

**Table S4. Fold induction values of *ERF5*, *ERF6*, *ERF1* and *ORA59* in response to *Botrytis cinerea* infection.** Fold change in transcript level observed in 4-week old wild-type Col-0 plants inoculated with *B. cinerea* spores at 18 or 48 h post-inoculation. Microarray data from the AtGenExpress project with the TAIR submission number ME00341. Values obtained from the eFP Browser on the Botany Array Resource (BAR) [49].

| <b>AGI number</b> | <b>Gene description</b> | <b>18 h</b> | <b>48 h</b> |
|-------------------|-------------------------|-------------|-------------|
| At5g47230         | ERF5                    | 1.3         | 1.35        |
| At4g17490         | ERF6                    | 1.15        | 1.25        |
| At3g23240         | ERF1                    | 4.31        | 11.52       |
| At1g06160         | ORA59                   | 4.12        | 1.93        |
